# Supplementary material for: Genome sequence of the progenitor of wheat A subgenome Triticum urartu
Source: PubMed Central journal article supplement (PMC6784869; doi:10.1038/s41586-018-0108-0), 2018-05-09
Supplement: 41586_2018_108_MOESM1_ESM.pdf [file 41586_2018_108_MOESM1_ESM.pdf]

In the format provided by the authors and unedited.

# Genome sequence of the progenitor of wheat A subgenome *Triticum urartu*

Hong-Qing Ling<sup>1,2,6\*</sup>, Bin Ma<sup>3,6</sup>, Xiaoli Shi<sup>1,6</sup>, Hui Liu<sup>3,6</sup>, Lingli Dong<sup>1,6</sup>, Hua Sun<sup>1,6</sup>, Yinghao Cao<sup>3</sup>, Qiang Gao<sup>3</sup>, Shusong Zheng<sup>1</sup>, Ye Li<sup>1</sup>, Ying Yu<sup>3</sup>, Huilong Du<sup>2,3</sup>, Ming Qi<sup>3</sup>, Yan Li<sup>3</sup>, Hongwei Lu<sup>2,3</sup>, Hua Yu<sup>3</sup>, Yan Cui<sup>1</sup>, Ning Wang<sup>1</sup>, Chunlin Chen<sup>1</sup>, Huilan Wu<sup>1</sup>, Yan Zhao<sup>1</sup>, Juncheng Zhang<sup>1</sup>, Yiwen Li<sup>1</sup>, Wenjuan Zhou<sup>1</sup>, Bairu Zhang<sup>1</sup>, Weijuan Hu<sup>1</sup>, Michiel J. T. van Eijk<sup>4</sup>, Jifeng Tang<sup>4</sup>, Hanneke M. A. Witsenboer<sup>4</sup>, Shancen Zhao<sup>5</sup>, Zhensheng Li<sup>1</sup>, Aimin Zhang<sup>1\*</sup>, Daowen Wang<sup>1,2\*</sup> & Chengzhi Liang<sup>2,3\*</sup>

---

<sup>1</sup>State Key Laboratory of Plant Cell and Chromosome Engineering, Institute of Genetics and Developmental Biology, Chinese Academy of Sciences, Beijing, China. <sup>2</sup>College of Life Sciences, University of Chinese Academy of Sciences, Beijing, China. <sup>3</sup>State Key Laboratory of Plant Genomics, Institute of Genetics and Developmental Biology, Chinese Academy of Sciences, Beijing, China. <sup>4</sup>Keygene N.V., Wageningen, The Netherlands. <sup>5</sup>BGI-Shenzhen, Shenzhen, China. <sup>6</sup>These authors contributed equally: Hong-Qing Ling, Bin Ma, Xiaoli Shi, Hui Liu, Lingli Dong, Hua Sun.  
\*e-mail: hqling@genetics.ac.cn; amzhang@genetics.ac.cn; dwwang@genetics.ac.cn; cliang@genetics.ac.cn

1 **SUPPLEMENTARY INFORMATION**

2

3

4 **Genome sequence of the progenitor of wheat A subgenome *Triticum urartu***

5 Hong-Qing Ling<sup>1,2\*#</sup>, Bin Ma<sup>3\*</sup>, Xiaoli Shi<sup>1\*</sup>, Hui Liu<sup>3\*</sup>, Lingli Dong<sup>1\*</sup>, Hua Sun<sup>1\*</sup>, Yinghao

6 Cao<sup>3</sup>, Qiang Gao<sup>3</sup>, Shusong Zheng<sup>1</sup>, Ye Li<sup>1</sup>, Ying Yu<sup>3</sup>, Huilong Du<sup>2,3</sup>, Ming Qi<sup>3</sup>, Yan Li<sup>3</sup>, Yan

7 Cui<sup>1</sup>, Ning Wang<sup>1</sup>, Chunlin Chen<sup>1</sup>, Huilan Wu<sup>1</sup>, Yan Zhao<sup>1</sup>, Juncheng Zhang<sup>1</sup>, Yiwen Li<sup>1</sup>,

8 Wenjuan Zhou<sup>1</sup>, Bairu Zhang<sup>1</sup>, Weijuan Hu<sup>1</sup>, Hongwei Liu<sup>2,3</sup>, Michiel J.T. van Eijk<sup>4</sup>, Jifeng

9 Tang<sup>4</sup>, Hanneke M.A. Witsenboer<sup>4</sup>, Shancen Zhao<sup>5</sup>, Zhensheng Li<sup>1</sup>, Aimin Zhang<sup>1#</sup>, Daowen

10 Wang<sup>1,2#</sup>, Chengzhi Liang<sup>2,3#</sup>

11

12 <sup>1</sup>State Key Laboratory of Plant Cell and Chromosome Engineering, Institute of Genetics and  
13 Developmental Biology, Chinese Academy of Sciences, Beijing, China

14 <sup>2</sup>College of Life Sciences, University of Chinese Academy of Sciences, Beijing, China.

15 <sup>3</sup>State Key Laboratory of Plant Genomics, Institute of Genetics and Developmental Biology,  
16 Chinese Academy of Sciences, Beijing, China

17 <sup>4</sup>Keygene N.V., Wageningen, the Netherlands

18 <sup>5</sup>BGI-Shenzhen, Shenzhen, China

19

20 \*These authors contributed equally to this work

21

22 #Corresponding authors

23

24

|    |                                                                                                                    |           |
|----|--------------------------------------------------------------------------------------------------------------------|-----------|
| 25 | <b>Content</b>                                                                                                     |           |
| 26 | <b>S1 Analyses of gene families and gene expression</b>                                                            | <b>3</b>  |
| 27 | S1.1 Transcription factor analysis.....                                                                            | 3         |
| 28 | S1.2 Families of disease resistance and prolamin genes.....                                                        | 3         |
| 29 | S1.3 Gene expression profiling in leaf, root and spike of <i>T. urartu</i> .....                                   | 4         |
| 30 | <b>S2 Comparative genomics analysis</b>                                                                            | <b>5</b>  |
| 31 | S2.1 Comparison of <i>T. urartu</i> genome with other wheat genomes.....                                           | 5         |
| 32 | S2.2 Genomic comparison of <i>T. urartu</i> (Tu) with <i>O. sativa</i> (Os), <i>B. distachyon</i> (Bd) and         |           |
| 33 | <i>S. bicolor</i> (Sb).....                                                                                        | 6         |
| 34 | S2.2.1 Collinearity of <i>T. urartu</i> versus <i>B. distachyon</i> , <i>O. sativa</i> and <i>S. bicolor</i> ..... | 6         |
| 35 | S2.2.2 Reconstruction of <i>T. urartu</i> chromosomes from 12 ancestral chromosomes .....                          | 7         |
| 36 | S2.3 Evolution of ancient duplicated blocks in <i>T. urartu</i> .....                                              | 8         |
| 37 | S2.4 Comparison of chromosome 3 of <i>T. urartu</i> (Tu3) with chromosome 3B of <i>T.</i>                          |           |
| 38 | <i>aestivum</i> (Ta3B) .....                                                                                       | 10        |
| 39 | S2.4.1 Comparisons of DNA and protein sequences between Tu3 and Ta3B.....                                          | 10        |
| 40 | S2.4.2 Collinearity between Tu3 and Ta3B.....                                                                      | 11        |
| 41 | S2.4.3 Identification of gene insertions and deletions on Tu3 and Ta3B .....                                       | 12        |
| 42 | <b>S3 Analysis of <i>T. urartu</i> populations</b>                                                                 | <b>12</b> |
| 43 | S3.1 RNA-seq reads mapping and SNP calling .....                                                                   | 12        |
| 44 | S3.2 Population genetic analysis.....                                                                              | 12        |
| 45 | <b>S4. References</b>                                                                                              | <b>13</b> |
| 46 |                                                                                                                    |           |
| 47 |                                                                                                                    |           |

## 48 **S1 Analyses of gene families and gene expression**

### 49 **S1.1 Transcription factor analysis**

50 Statistical tests showed that the gene number of the most transcriptional factor families was  
51 relatively conserved among the 7 genomes with an exception of transcriptional factor B3  
52 family (**Supplementary Data 3**). The gene number of the B3 family was significantly  
53 increased in *T. urartu*, *Ae. tauschii* and *T. aestivum* in comparison to that in *B. distachyon*, *O.*  
54 *sativa*, *S. bicolor* and *Z. mays*. By identifying orthologues of these B3 transcriptional factors  
55 in *Arabidopsis* (Luo et al., 2013, Swaminathan et al., 2008), we assigned the B3  
56 transcriptional factors of *T. urartu* to four subfamilies, AUXIN RESPONSE FACTOR (ARF),  
57 RELATED TO ABI3 and VP1 (RAV), REPRODUCTIVE MERISTEM (REM) and LEAFY  
58 COTYLEDON2 [LEC2]–ABSCISIC ACID INSENSITIVE3 [ABI3]–VAL (LAV).  
59 Interestingly, the enlarged number of B3 transcription factors in the three wheat genomes is  
60 mainly caused by the expanded REM subfamily (**Extended Data Figure 4c**). It was reported  
61 that the REM subfamily functions preferentially in flower development and vernalization  
62 (Luo et al., 2013). Thus, dominant B3 transcription factors in wheat genome may be related to  
63 the adaption of cold season and involved in the processes of vernalization and flower  
64 development. However, more experiments are needed to confirm it.

### 65 **S1.2 Families of disease resistance and prolamin genes**

66 Given the report that there was a specific expansion of R genes (disease resistance genes) in  
67 the *T. urartu* genome (Ling et al., 2013), we also conducted comparison on R genes. A total of  
68 598 genes that encode NB-ARC domain and disease resistance proteins were identified,  
69 compared to 593 R genes which were detected in the draft genome of *T. urartu* (Ling et al.,  
70 2013). The chromosomal locations of the R genes are shown in **Supplementary Data 4**.  
71 Among the 598 R genes, only seven genes (1.2%) were not completely sequenced, and  
72 contained 'N's in their ORF or the 1 kb promoter sequence, whereas 36.3% of R genes  
73 reported in the draft sequence (Ling et al., 2013) carried with N bases. These results further  
74 support the improved quality and completeness of our new assembly. This information will  
75 facilitate the functional studies of R genes in *T. urartu* and their applications in improving the  
76 disease resistance of wheat.

77 In bread wheat, prolamin proteins play a major role in controlling the end-use quality of  
78 grains. The genes encoding prolamins are carried mainly in *Glu-1* (specifying high-molecular  
79 weight glutenin subunits), *Glu-3* (specifying low-molecular weight glutenin subunits), *Gli-1*  
80 (specifying  $\gamma$ - and  $\omega$ -gliadins) and *Gli-2* (specifying  $\alpha$ -gliadins) loci. In our *T. urartu* genome  
81 sequence, the loci orthologous to *Glu-1* (i.e., *Glu-A1*), *Glu-3* (*Glu-A3*), *Gli-1* (*Gli-A1*) or *Gli-2*

82 (*Gli-A2*) were well assembled. Two high-molecular weight glutenin subunit genes were  
83 present in *Glu-A1*. Four active genes, encoding i-type low-molecular weight glutenin subunits,  
84 were found in *Glu-A3*. In *Gli-A1*, five genes encoding one  $\gamma$ - and four  $\omega$ -gliadins were  
85 annotated. In *Gli-A2*, 11  $\alpha$ -gliadin genes were detected (**Supplementary Data 5**). The  
86 organization and gene numbers observed at the *Glu-A1*, *Glu-A3* and *Gli-A1* loci of *T. urartu*  
87 are well consistent with previous studies on corresponding loci in bread wheat and the D  
88 genome donor *Ae. tauschii* (Dong et al., 2016, Dong et al., 2010) and comparable to the  
89 annotations in the A subgenome of the common wheat land race Chinese Spring (CS) by  
90 Clavijo *et al.* (2017) (two HMW-GS, four LMW-GS, six  $\gamma$ -gliadin, three  $\omega$ -gliadin, and 10  
91  $\alpha$ -gliadin genes). These results present a valuable reference for future studies on this  
92 important locus in bread wheat and related grasses.

### 93 **S1.3 Gene expression profiling in leaf, root and spike of *T. urartu***

94 We identified 61,145 transcripts using RNA-seq data of three *T. urartu* tissues leaf, root  
95 and spike. Of them, 5,944 (9.7%), 3,884 (6.4%) and 5,483 (9.0%) revealed a differential  
96 expression (FDR < 1e-4) between leaf and root, between leaf and spike as well as between  
97 spike and root, respectively. The differentially expressed genes were partitioned into clusters  
98 with dominantly high expression in spike (**Supplementary Information Figure S1a**), leaf  
99 (**Supplementary Information Figure S1b**) and root (**Supplementary Information Figure**  
100 **S1c**), respectively. Gene ontology analysis of genes within each group shows organ specificity  
101 in gene functions. Genes that are preferentially expressed in spike are enriched for GO terms  
102 relative to hydrolase activity, polysaccharide, carbohydrate, fatty acid and lipid metabolic  
103 processes (**Supplementary Information Figure S1a**); leaf specifically expressed genes are  
104 enriched for photosynthesis, pigment, chlorophyll and tetrapyrrole metabolic processes  
105 (**Supplementary Information Figure S1b**); and root specific genes are enriched for  
106 oxidoreductase, peroxidase and antioxidant activity (**Supplementary Information Figure**  
107 **S1c**).

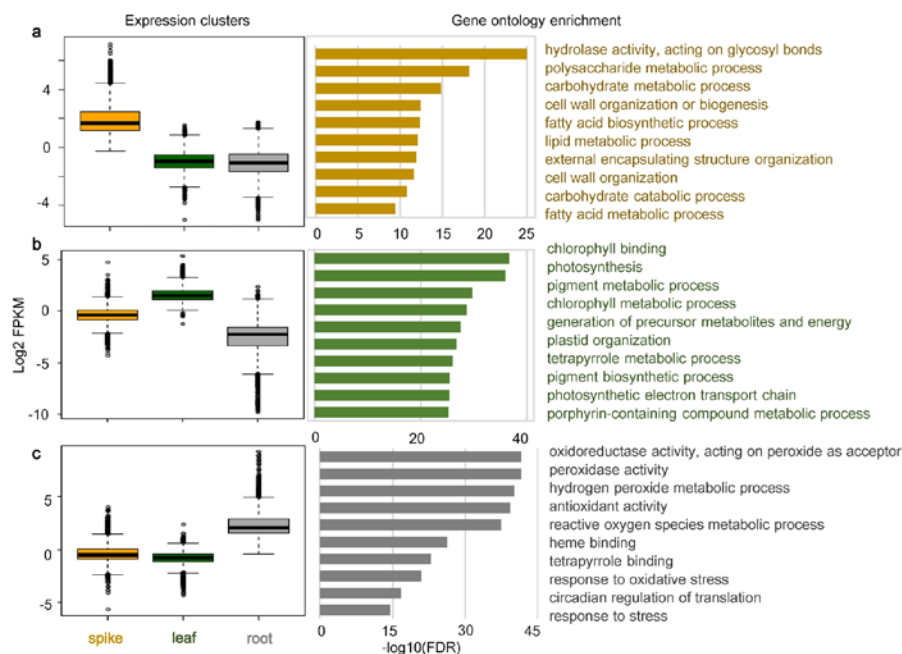

108

109 **Supplementary Information Figure 1. Gene expression level in three organs of *T. urartu*.** Left  
 110 panels display the expression clusters of three groups of genes preferentially highly expressed  
 111 in spike (n = 3,170 genes; boxplots minima (from left to right) = -0.23, -4.95, -4.97; maxima =  
 112 7.12, 1.52, 1.77; medians = 1.66, -0.94, -1.05; percentiles (75%) = 2.47, -0.49, -0.47); leaf (n  
 113 = 2,915 genes; boxplots minima (from left to right) = -4.36, -1.27, -9.85; maxima = 4.74, 5.27,  
 114 2.35; medians = -0.37, 1.48, -2.23; percentiles (75%) = 0.06, 1.97, -1.56) and root (n = 3,007  
 115 genes; boxplots minima (from left to right) = -5.66, -4.33, -0.44; maxima = 3.96, 2.37, 9.21;  
 116 medians = -0.51, -0.77, 2.06, percentiles (75%) = 0.02, -0.45, 2.88), respectively. Right panels  
 117 show gene ontology analysis of the three groups.  
 118

## 119 S2 Comparative genomics analysis

### 120 S2.1 Comparison of *T. urartu* genome with other wheat genomes

121 As shown in **Figure 2a and 2b** and **Extended Data Figure 5a**, the 7 pseudomolecules of *T.*  
 122 *urartu* (Tu) showed a good collinearity with the A, B and D subgenomes of *T. aestivum* (Ta).  
 123 Meanwhile, we detected several structure variations (segmental inversions and translocations)  
 124 during wheat genome evolution: (1) We discovered that ~573-605 Mb region of Tu4 is  
 125 syntenic to Ta5BL/Ta5DL and ~605-649 Mb region of Tu5 syntenic to Ta4BL/Ta4DL,  
 126 whereas they are clearly collinear with the corresponding parts of Ta4A and Ta5A. Similar  
 127 phenomena were also found in comparison between *T. urartu* and *Ae. tauschii* (**Extended**  
 128 **Data Figure 5a**). The results support that a reciprocal translocation should be occurred at the  
 129 distal end of long arms between Tu4 and Tu5, and the translocation event happened after the

130 divergence of A, B and D genomes and before tetraploidization of A and B genomes. Similar  
131 observed results were reported by Miftahudin et al. (2004) and Ma et al. (2015). (2) We also  
132 observed that a fragment at end Tu7, which showed a good synteny with the corresponding  
133 part of Ta7A, Ta7D and chromosome 7 of *Ae. tauschii*, but not with the corresponding  
134 fragment of Ta7B, displayed a synteny with the end part of Ta4A in comparison of Tu with Ta  
135 (**Figures 2a and 2b, Extended Data Figure 5a**). Based on the results, it is reasonable to  
136 deduce that the distal segment localized on Ta4A should come from a one way translocation  
137 from Ta7B, which is similar with the reports (Miftahudin et al., 2004, Ma et al., 2015, Clavijo  
138 et al., 2017). This translocation event occurred during/after polyploidization of A and B  
139 genomes. The novel translocations found in TGACv1 hexaploid wheat genome (Clavijo et al.,  
140 2017) were not identified in Tu genome. (3) Another obvious genome structure variation was  
141 observed between Tu4 and Ta4A, where Tu4AL corresponds to Ta4AS and Tu4AS to Ta4AL  
142 (**Figures 2a and 2b**), while such variation was not determined in comparison of Tu4 with TaB  
143 and TaD genomes. This result indicates that a pericentric inversion involving most of the long  
144 and short arm occurred on Ta4A during the evolution of Ta4A chromosome. This inversion  
145 occurred during or after the generation of tetra- or hexaploid wheat, since it was only found  
146 on Ta4A.

## 147 **S2.2 Genomic comparison of *T. urartu* (Tu) with *O. sativa* (Os), *B. distachyon* (Bd) 148 and *S. bicolor* (Sb)**

### 149 **S2.2.1 Collinearity of *T. urartu* versus *B. distachyon*, *O. sativa* and *S. bicolor***

150 The evolutionary relationships between wheat and several other genome-sequenced grasses  
151 including *Brachypodium*, sorghum and rice had been reported (The International  
152 Brachypodium Initiative, 2010). Among them, *Brachypodium* is the closest and sorghum the  
153 farthest relative of wheat. The former diverged with wheat about 32-39 MYA and the latter  
154 about 45-60 MYA. Rice split with wheat about 40-54 MYA.

155 We found that Tu3 and Tu6 were two mostly conserved chromosomes. Tu3 shared  
156 common ancestor with Os1-Bd2-Sb3, while Tu6 with Os2-Bd3-Sb4. Notably, syntenic  
157 regions of consecutive Tu chromosomal segments were separated by non-homologous DNA  
158 segments with varied length in Bd, Os and Sb. For Tu3, two collinear blocks were separated  
159 by non-collinear segment of 12-40 Mb on Bd2, 10-20 Mb on Os1 and 12-48 Mb on Sb3. As  
160 for Tu6, two collinear regions were divided by 8-47 Mb on Bd3, 9-20 Mb on Os2 and 13-49  
161 Mb on Sb4. The results suggest that segmental deletions likely occurred on Tu3 and Tu6 after  
162 divergence between Tu and Bd (**Figure 2c, Extended Data Figure 6, Supplementary Data  
163 6**).

164 The second conserved chromosomes were Tu1, Tu2, Tu4 and Tu7, which comprised of  
165 two chromosomal segments originated from different ancient chromosomes. The majority of  
166 Tu1 were orthologous with Os5-Bd2-Sb9. Homologous segments of Os10-Bd3-Sb1 inserted  
167 into it. About 400 Mb segment (from 20 to 420 Mb) of the Tu2 shared common ancestor with  
168 Os7-Bd1-Sb2, and two segments around it corresponded to Os4-Bd5-Sb6. The smaller  
169 segment was about 20 Mb and the larger one was from ~420 to ~740 Mb. Similarly, most  
170 chromosomal regions of Tu4 and Tu7 were orthologous with Os3-Bd1-Sb1 and  
171 Os6-Bd1-Sb10, respectively. Internal parts from ~51 to ~141 Mb on Tu4 were homologous  
172 segments of Os11-Bd4-Sb5 and from ~168 to ~470 Mb on Tu7 were homologous segments of  
173 Os8-Bd3-Sb7 (**Figure 2c, Extended Data Figure 6, Supplementary Data 6**)

174 The least conserved *T. urartu* chromosome was Tu5. It was derived by concatenation of  
175 segments originated from three different ancestor chromosomes. Sequentially, segment from 0  
176 to ~317 Mb on Tu5 was homologous to Os12-Bd4-Sb8; segment from ~317 to ~530 Mb  
177 corresponded to Os9-Bd4-Sb2 and segment from ~530 to ~648 Mb corresponded to  
178 Os3-Bd1-Sb1 (**Figure 2c, Extended Data Figure 6, Supplementary Data 6**). This  
179 observation is consistent with the model described by Pont et al. (2013).

### 180 **S2.2.2 Reconstruction of *T. urartu* chromosomes from 12 ancestral chromosomes**

181 Based on the report that rice well maintained the basic structure of 12 chromosomes of grass  
182 ancestor (Salse et al., 2008), we reconstructed the chromosomal evolution model of *T. urartu*  
183 from the 12 ancestral chromosomes (A1-A12) using the precise collinear relationships  
184 between *T. urartu* and rice. The *T. urartu* chromosomes were mostly formed by insertion of  
185 one ancestral chromosome into centromeric region of another. Tu1 was formed by insertion of  
186 A10 into A5 (corresponding to Os10 and Os5), Tu2 by insertion of A7 into A4 (corresponding  
187 to Os7 and Os4), Tu4 by insertion of A11 into A3 (corresponding to Os11 and Os3) and Tu7  
188 by insertion of A8 into A6 (corresponding to Os8 and Os6). Tu5 is an exception. It was  
189 derived from concatenation of A12 and A9 (corresponding to Os12 and Os9). Moreover,  
190 segments from two distal ends of A3 joined with A9 to build a complete Tu5 (**Figure 2c**).  
191 There were two inversions and three translocations in the formation of *T. urartu* genome. The  
192 fusion models of *T. urartu* chromosomes from ancestral chromosomes are completely  
193 different from that of *B. distachyon* (The International Brachypodium Initiative, 2010),  
194 indicating that the chromosome evolution of *T. urartu* (even Triticeae) must be independent  
195 from that of *B. distachyon*.

196 To perform more accurate and detailed investigation of the evolutionary scenario of *T.*  
197 *urartu* at gene level, we inferred 11,718 *T. urartu* AGK (ancestral grass karyotype) genes via



198 identifying orthologues from the 14,241 AGK genes defined by Murat et al. (2017). AGK  
199 genes in *T. urartu* accounted for 31.2% of all chromosome localized genes. This was lower  
200 than the percentages detected in rice (32.4%) and *Brachypodium* (47.4%) (Murat et al., 2017).  
201 These AGK genes were depleted in pericentromeric and subtelomeric regions (**Figure 2c**),  
202 indicating that more new genes are likely to occur in these regions of *T. urartu* genome.

203 With above mentioned model of chromosome reconstruction, we accurately localized the  
204 loci of chromosomal fusions of *T. urartu* and investigated the relationships between  
205 localizations of chromosomal fusions and AGK genes. We observed that fusion locations were  
206 preferentially in the non-AGK gene-rich regions (**Figure 2c**). Chi-square test also supported  
207 that AGK genes significantly depleted at fusion locations (p-value = 0.02). Thus non-AGK  
208 genes-rich regions have more chance to occur chromosomal structure variations in *T. urartu*  
209 evolution.

### 210 **S2.3 Evolution of ancient duplicated blocks in *T. urartu***

211 The common ancestor of grasses has undergone a whole genome duplication (WGD) and  
212 subsequent events including chromosome translocations, fusions and insertions to shape the  
213 structure of extant various grass genomes. Seven ancestral chromosomes were doubled into  
214 14 chromosomes and subsequent two chromosomal fusions formed a 12-chromosome  
215 ancestor. Ancestral duplicated chromosomes were majorly maintained in rice. They are  
216 Os1-Os5, Os2-Os4, Os2-Os6, Os3-Os7, Os3-Os10, Os8-Os9 and Os11-Os12 (Salse et al.,  
217 2008). Five duplication blocks were identified based on an intra-specific comparison of *T.*  
218 *urartu* genome.

219 The largest duplication block is between Tu1 and Tu3 covering the chromosomal regions  
220 from 434-557 Mb on Tu1 and 389-634 Mb on Tu3 (**Extended Data Figure 7f**). Synteny  
221 analysis of Tu3 vs. Os1 and Tu1 vs. Os5 showed that large segments of these two groups of  
222 chromosomes were collinear. The duplicated block between Tu1 and Tu3 corresponds to rice  
223 duplicated block between Os1 and Os5 (**Extended Data Figures 8a and 7f**). We identified  
224 693 syntenic genes between Os1 and Os5. Of them, 310 (45%) and 320 (46%) genes of Os1  
225 and Os5 have syntenic orthologues on Tu3 and Tu1, respectively, while only 147 (21%) genes  
226 are paired in *T. urartu* (**Extended Data Figure 7g**).

227 Another significant *T. urartu* block is between Tu2 and Tu6. It corresponds to the rice  
228 duplication block between Os2 and Os4 (**Extended Data Figures 7d and 7f**). There are 378  
229 syntenic paralogues between Os2 and Os4. Of them, 107 (28%) and 206 (54%) genes of Os2  
230 and Os4 have syntenic orthologues on Tu6 and Tu2, respectively, where 60 (16%) genes are

231 paired in *T. urartu* (**Extended Data Figure 7g**).

232 Other two *T. urartu* duplication blocks are between Tu6 and Tu7. One located on 2-141  
233 Mb and 578-680 Mb of Tu6 and Tu7, the other on 471-548 Mb and 78-172 Mb of Tu6 and  
234 Tu7 (**Extended Data Figures 7d and 7f**). Synteny analysis of Tu6 vs. Os2 and Tu7 vs. Os6  
235 indicates that the two *T. urartu* blocks correspond to rice duplication between Os2 and Os6  
236 (**Extended Data Figure 7d**). There are 425 syntenic paired-genes between Os2 and Os6.  
237 About 22% of the gene pairs are maintained in the collinear blocks of Tu6 and Tu7  
238 (**Extended Data Figure 7g**).

239 The last *T. urartu* duplicated block between Tu5 and Tu7 (Segments 346-523 Mb on Tu5  
240 and 201-282 Mb on Tu7) corresponds to rice duplication between Os8 and Os9 (**Extended**  
241 **Data Figures 7b and 7f**). About 10% of 305 gene pairs in rice block between Os8 and Os9  
242 were maintained in the syntenic block between Tu7 and Tu5 (**Extended Data Figure 7g**).

243 In addition, counterparts of three rice duplication pairs, Os3-Os7, Os3-Os10 and  
244 Os11-Os12, are not visible in *T. urartu*. Collinearity between *T. urartu* and Os3, Os7 and  
245 Os10 is significant, but the corresponding *T. urartu* pairs fail to show significant intra-specific  
246 collinearity (**Extended Data Figures 7e and 7f**). Surprisingly, a highly conserved duplication  
247 between Os11 and Os12 in rice was lost in *T. urartu*. Almost none of paired-genes in the  
248 duplication between Os11 and Os12 are maintained in *T. urartu* (**Extended Data Figure 7c**).  
249 These observations indicated that Tu4, which was formed by insertion of A11 into A3, and  
250 Tu5, which was formed by concatenation of A12, A9 and segments from A3, were subjected  
251 to more variations in wheat evolution.

252 Rice and *T. urartu* inter-specific collinearity showed that, except for a segment on Os10,  
253 both copies of rice syntenic chromosomal segments exist in *T. urartu* genome. Observable Tu  
254 syntenic blocks generally retained more collinear gene pairs than regions missing  
255 intra-specific collinearity (**Extended Data Figure 7g**). Within 2,620 syntenic paired-genes  
256 produced by intra-specific duplication of rice, 2,231 lost single or double copy in *T. urartu*.  
257 More than 47% of paired-gene losses in *T. urartu* were caused by missing of single gene copy.  
258 *T. urartu* counterparts of Os11 and Os12 were Tu4 and Tu5, respectively. Synteny between  
259 Os11 and Os12 is invisible between Tu4 and Tu5. It lost almost all syntenic paired-genes in *T.*  
260 *urartu* and 63% were double-copy losses. Two corresponding segments were close to  
261 centromere with sparse genes in *T. urartu* and two telomeric segments with dense genes in  
262 rice genome (**Extended Data Figure 7c**). Severe damage of this collinearity might be due to  
263 alteration of chromosomal localization and accumulation of massive transposable elements  
264 during speciation of the Triticeae. Overall, only a small portion of collinearity formed by the

265 WGD of common ancestor of grasses was maintained in *T. urartu*. No large scale segmental  
266 or whole genome duplications were found in *T. urartu* genome since its divergence from the  
267 common ancestor of grasses.  
268

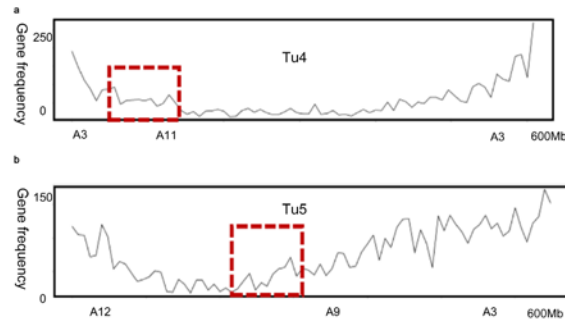

269  
270 **Supplementary Information Figure S2: Gene frequency distribution at ancient duplicated**  
271 **segments between Tu4 and Tu5.** Tu4 is comprised of A3 and A11 and Tu5 is comprised of A12, A9  
272 and A3. Ancestral duplicated segments corresponding to duplication between Os11 and Os12 are  
273 displayed by red rectangles.

## 274 **S2.4 Comparison of chromosome 3 of *T. urartu* (Tu3) with chromosome 3B of *T.*** 275 ***aestivum* (Ta3B)**

### 276 **S2.4.1 Comparisons of DNA and protein sequences between Tu3 and Ta3B**

277 To ensure the genes on Tu3 and Ta3B comparable, we used the same gene prediction  
278 method described in Methods to re-annotate genes on Ta3B (**Supplementary Information**  
279 **Table 1**). The proteins of Tu3 were aligned to Ta3B and vice versa. We chose alignments with  
280 identity >50% and coverage >50%. In total, 3,103 genes (52.32%) on Tu3 are homologous to  
281 Ta3B. On the other hand, 3,542 genes (52.99%) on Ta3B were aligned to Tu3. At the  
282 conserved level of identity >90% and coverage >90%, only 1,721 genes (29.02%) on Tu3  
283 were found to be homologous to Ta3B while 2,017 genes (30.18%) on Ta3B are homologous  
284 to Tu3 (**Extended Data Figure 8a**).

285 Peaks of TE insertion date frequency distributions located between one and two MYA on  
286 Tu3 and Ta3B. According to the fact that the ancestor of A and B genomes diverged about  
287 6-7 MYA (Marcussen et al., 2014), we speculate that in *T. urartu* the recent retrotransposon  
288 burst occurred after split of the ancestor of A and B genomes. In addition, a recent burst of  
289 retrotransposons at around 0.1 MYA was found on Ta3B but not on Tu3 (**Extended Data**  
290 **Figure 8h**). The data suggest a recent genomic expansion caused by burst of retrotransposons  
291 occurred on Ta3B. This can well explain why the Ta3B is larger than Tu3.

292 **Supplementary Information Table 1: Comparison of gene numbers and features of Tu3 and**  
 293 **Ta3B**

|                                   | <b>Tu3</b>  | <b>Ta3B<sup>‡</sup></b> | <b>Ta3B<sup>§</sup></b> |
|-----------------------------------|-------------|-------------------------|-------------------------|
| Gene number                       | 5,931       | 6,684                   | 5,966                   |
| Max gene length                   | 52,262      | 61,710                  | 182,386                 |
| Min gene length                   | 204         | 201                     | 111                     |
| Gene length*                      | 2,253/3,214 | 2,240/3,503             | 1,610/2,738             |
| Transcript length*                | 1,216/1,402 | 1,188/1,381             | 924/1,105               |
| Max CDS length                    | 9,145       | 7,845                   | 8,718                   |
| CDS length*                       | 742/970     | 777/984                 | 924/1,105               |
| Protein length*                   | 248/324     | 258/327                 | 307/367                 |
| Exon length*                      | 171/312     | 166/296                 | 147/265                 |
| Intron length*                    | 139/483     | 134/532                 | 146/514                 |
| 5' UTR length*                    | 110/197     | 98/185                  | 0                       |
| 3' UTR length*                    | 252/307     | 233/291                 | 0                       |
| Exon# per transcript <sup>†</sup> | 3.1/4.5     | 3.0/4.7                 | 3.0/4.2                 |
| Transcript# per gene <sup>†</sup> | 1.0/1.5     | 1.0/1.7                 | 1.0/1.0                 |

294 \* The median/average length in base pair (bp). Tu, *T. urartu*; Ta, *T. aestivum*.

295 † The median/average in number.

296 ‡ IGDBV1 gene sets

297 § Ensembl gene sets

298

### 299 **S2.4.2 Collinearity between Tu3 and Ta3B**

300 A total of 247 syntenic blocks were detected. On average, each block covered 5.5 Mb  
 301 chromosomal segment, containing 53 genes on Tu3 and 51 genes on Ta3B with about 9  
 302 collinear genes. The largest syntenic block covered a chromosomal segment of 64.3 Mb with  
 303 419 genes on Tu3 and 445 genes on Ta3B. Of them, 78 genes are collinear. All syntenic  
 304 blocks covered 617 Mb (82.6%) and 651 Mb (84.1%) sequence of Tu3 and Ta3B,  
 305 respectively (**Extended Data Figure 8b**). These are consistent to the results obtained from  
 306 DNA collinearity from MUMmer.

307 On the basis of the genomic annotations and collinearity analysis, we studied DNA  
 308 contractions and expansions between Tu3 and Ta3B. **Extended Data Figure 8c** showed a  
 309 syntenic block composed of five consecutive collinear gene pairs. About 100 kb larger  
 310 repetitive DNA were inserted on Ta3B compared to Tu3, leading to expansion in this Ta3B  
 311 syntenic region. **Extended Data Figure 8d** showed another syntenic block composed of  
 312 seven consecutive collinear gene pairs. We found 70 kb repetitive DNA contraction in the  
 313 syntenic region of Ta3B compared to Tu3. **Extended Data Figure 8e** showed eight collinear

314 gene pairs, which were separated by non-collinear genes. Obvious DNA expansion involving  
315 six genes was found on Ta3B. Compared to Tu3 (0.9 Mb), Ta3B (1.6 Mb) expanded ~0.7 Mb  
316 within the syntenic regions. **Extended Data Figure 8f** showed five collinear gene pairs,  
317 which were separated by non-collinear genes. Thirteen genes were lost on Ta3B. Compared  
318 with Tu3 (8.3 Mb), Ta3B (1.3 Mb) contracted about 7 Mb. **Extended Data Figure 8g** showed  
319 collinear gene regions among Bd2 (0.3 Mb), Tu3 (4.4 Mb) and Ta3B (11.2 Mb). Compared to  
320 the segment of Tu3, large number of non-homologous genes and repeats was observed on the  
321 region of Ta3B, resulting in 7 Mb expansion.

### 322 **S2.4.3 Identification of gene insertions and deletions on Tu3 and Ta3B**

323 We identified 354 and 648 insertion genes and 393 and 213 deletion genes within the 176  
324 syntenic blocks of Tu3 and Ta3B, respectively (**Supplementary Data 7**). Our data showed  
325 that more gene insertions occurred in collinear segments of Ta3B than that of Tu3. On the  
326 other hand, less gene deletions occurred in collinear segments of Ta3B than that of Tu3. All  
327 data indicate that Ta3B had undergone considerable gene expansion after divergence of A and  
328 B genomes.

## 329 **S3 Analysis of *T. urartu* populations**

### 330 **S3.1 RNA-seq reads mapping and SNP calling**

331 The average mapping ratio against the G1812 reference genome was 74.5%. After quality  
332 control, we identified 144,806 SNPs (minor allele frequency  $\geq 0.05$ ), involved in 22,841 genes.  
333 The average SNP frequency was 6.3 per gene. The SNPs were mainly distributed in  
334 chromosome arms (**Extended Data Figure 9a**).

### 335 **S3.2 Population genetic analysis**

336 Group I included 30 accessions, among which 13 were from Turkey, with the remaining from  
337 Armenia, Iraq, Lebanon or Syria. About 88% and 92% accessions of Group II and Group III  
338 were from Lebanon and Turkey, respectively. The three groups uncovered using  
339 STRUCTURE corresponded well to those based on phylogenetic clustering with respect to  
340 accession composition in each group. Based on  $\pi$  and  $\theta$  calculations, the genetic diversity  
341 values for *T. urartu* accessions of Group I was highest with  $\pi = 4.01 \times 10^{-5}$ ,  $\theta = 2.07 \times 10^{-5}$ ,  
342 Group III was found to be slightly reduced ( $\pi = 3.71 \times 10^{-5}$ ,  $\theta = 1.81 \times 10^{-5}$ ) and Group II,  
343 mainly from Lebanon, was the lowest with  $\pi = 3.56 \times 10^{-5}$ ,  $\theta = 1.77 \times 10^{-5}$ . The genetic  
344 differentiation (*Fst*) between group I and group III was modest 0.10. There was an obvious  
345 genetic distinction between Group I and Group II, and the Group II and Group III, with the

346 *Fst* estimated to be 0.20 and 0.19, respectively (**Extended Data Figure 9c**). The accessions of  
347 *T. urartu* showed clear differences in the range of altitudes (from 400 m to 1650 m) at which  
348 they grew and were collected. The altitudes of the accessions of Group II were mainly from  
349 1000 m, and of Group III mainly from 600 m (**Extended Data Figure 9b**). Thus, altitude may  
350 be an important environmental factor contributing to the genetic diversity in *T. urartu*  
351 population. Furthermore, when inoculated with the wheat powdery mildew pathogen  
352 *Blumeria graminis* f. sp. *tritici* (*Bgt*, race E09, Zhang et al., 2016), the majority of the  
353 accessions in the Group II (92.2%) exhibited resistance, whereas most of the accessions in  
354 Groups I and III (96.7% and 90.6%, respectively) were susceptible (**Extended Data Figure**  
355 **9d**). The differences among the three groups prompted us to conduct genomic scans for  
356 selective sweeps using the 144,806 SNPs identified in 22,841 expressed genes (see above).  
357 Based on the top 1%  $\pi$  ratio, 141 ( $\pi_{\text{Group I}}/\pi_{\text{Group II}} > 7.7$ ) and 143 ( $\pi_{\text{Group III}}/\pi_{\text{Group II}} > 4.3$ )  
358 candidate sweep signals were identified (**Extended Data Figure 9e**). The significant selective  
359 sweep signals corresponded to 239 high-confidence (HC) genes, 154 of which had functional  
360 annotations (**Supplementary Data 9**), and 23 of which were *T. urartu*-specific. Interestingly,  
361 we did not detect any significant enrichment among the HC genes for any particular GO or  
362 KEGG categories, suggesting that the functional processes that have been influenced by high  
363 altitude adaptation are quite broad. Among the 23 *T. urartu*-specific genes, one  
364 (TuG1812G0700005988) was predicted to encode a plant specific dehydrin with a calculated  
365 molecular mass of 12.8 kDa. The deduced protein carries three lysine-rich K-segments, and  
366 resembles the smallest dehydrin that has been found up-regulated by cold stress in wheat  
367 plants (Ohno et al., 2003). The population at highest altitude showed lowest genetic diversity  
368 and strong resistance to *Bgt*, indicating that Group II accessions were subjected to strong  
369 selection pressure and experienced complex adaption for improving their viability.

370

#### 371 **S4. References**

- 372 Clavijo B J, Venturini L, Schudoma C, *et al.*, 2017. An improved assembly and annotation of  
373 the allohexaploid wheat genome identifies complete families of agronomic genes and  
374 provides genomic evidence for chromosomal translocations. *Genome Res.*, **27**, 885-896.
- 375 Dong L, Huo N, Wang Y, *et al.*, 2016. Rapid evolutionary dynamics in a 2.8-Mb  
376 chromosomal region containing multiple prolamin and resistance gene families in  
377 *Aegilops tauschii*. *Plant J.* **87**, 495-506
- 378 Dong L, Zhang X, Liu D, *et al.*, 2010. New insights into the organization, recombination,  
379 expression and functional mechanism of low molecular weight glutenin subunit genes in  
380 bread wheat. *PLoS One* **5**, e13548.
- 381 International Brachypodium I, 2010. Genome sequencing and analysis of the model grass  
382 *Brachypodium distachyon*. *Nature* **463**, 763-768.

383 Ling HQ, Zhao S, Liu D, *et al.*, 2013. Draft genome of the wheat A-genome progenitor  
384 *Triticum urartu*. *Nature* **496**, 87-90.

385 Luo G, Ye L, Chen X, 2013. Research progress of Arabidopsis B3 transcription factor gene  
386 superfamily. *Chemistry of Life* **33**, 287-293.

387 Ma J, Stiller J, Zheng Z, *et al.*, 2015. Putative interchromosomal rearrangements in the  
388 hexaploid wheat (*Triticum aestivum* L.) genotype 'Chinese Spring' revealed by gene  
389 locations on homoeologous chromosomes. *BMC Evol. Biol.* **15**, 37.

390 Marcussen T, Sandve SR, Heier L, *et al.*, 2014. Ancient hybridizations among the ancestral  
391 genomes of bread wheat. *Science* **345**, 1250092.

392 Miftahudin, Ross K, Ma XF, *et al.*, 2004. Analysis of expressed sequence tag loci on wheat  
393 chromosome group 4. *Genetics* **168**, 651-663.

394 Murat F, Armero A, Pont C, *et al.*, 2017. Reconstructing the genome of the most recent  
395 common ancestor of flowering plants. *Nat. Genet.* **49**, 490-496.

396 Pont C, Murat F, Guizard S, *et al.*, 2013. Wheat syntenome unveils new evidences of  
397 contrasted evolutionary plasticity between paleo- and neoduplicated subgenomes. *Plant J.*  
398 **76**, 1030-1044.

399 Ohno R, Takumi S, Nakamura C, 2003. Kinetics of transcript and protein accumulation of a  
400 low-molecular-weight wheat LEA D-11 dehydrin in response to low temperature. *J. Plant*  
401 *Physiol.* **160**, 193-200.

402 Salse J, Bolot S, Throude M, *et al.*, 2008. Identification and characterization of shared  
403 duplications between rice and wheat provide new insight into grass genome evolution.  
404 *Plant Cell* **20**, 11-24.

405 Swaminathan K, Peterson K, Jack T, 2008. The plant B3 superfamily. *Trends Plant Sci.* **13**,  
406 647-655.

407 Zhang, J., *et al.*, 2016. Coexpression network analysis of the genes regulated by two types of  
408 resistance responses to powdery mildew in wheat. *Sci. Rep.* **6**:23805.

409
